# Supplementary material for: Genetic correlates of brain aging on MRI and cognitive test measures: a genome-wide association and linkage analysis in the Framingham study
Source: Springer Nature journal article supplement (doi:10.1186/1471-2350-8-s1-s15), 2007-09-01
Supplement: Additional file 1 [file 1471-2350-8-s1-s15-s1.doc]

##### **Additional file:** Table 1: Description of Cognitive Phenotypes

| **Cognitive Factors** | **Major cognitive domains assessed** | **Measures of performance summed to yield total score** |
| --- | --- | --- |
| **FACTOR 1: Verbal Memory (VM):** | | |
| WMS‡ Logical memory – Paragraph A | Verbal memory | Immediate Recall (LM-IR); Delayed Recall (LM-DR); Delayed recognition (LM-Rec) |
|  |  |  |
| **FACTOR 2: Visuospatial Memory & Organization (VMO):** | | |
| WMS Visual reproductions | Visual memory | Immediate Recall (VR-IR); Delayed Recall (VR-DR); Delayed recognition (VR-Rec) |
| Hooper Visual organization4 | Visual perception | Total score (VOT) |
|  | | |
| **FACTOR 3: Attention and Executive Function :** | | |
| Trails A and B§ | Simple attention, Executive function | Time to completion (minutes) for each test (TMT-A; TMT-B) |
| **Additional Tests** | | |
| WAIS † Similarities | Abstract reasoning | Total score (Sim) |
| Boston Naming Test (30 items) | Language-naming | Total score without cues (BNT) |
| Wide Range Achievement Test - Reading | Reading, Native intelligence | Total raw score (WRAT) |

† Wechsler Adult Intelligence Scale

‡ Wechsler Memory Scale

§ Halstead Reitan Neuropsychological Test Battery

***Additional file:* Table 2: Candidate Gene List for Brain Aging (MRI Volumes and Cognitive Function) Phenotypes**

| **Gene** | **Chromosome** | **Start** | **End** | **Number of SNPs in 100K Affymetrix Gene Chip within 60 Kb of gene** | **Number of SNPs used in analyses** |
| --- | --- | --- | --- | --- | --- |
| *A2M* | 12 | 9051576 | 9219754 | 6 | 6 |
| *ACE* | 17 | 58848165 | 59012935 | 0 | 0 |
| *ADCY8* | 8 | 131801728 | 132183854 | 30 | 29 |
| *ADCY9* | 16 | 3892653 | 4166187 | 6 | 6 |
| *ADD1* | 4 | 2822589 | 3028794 | 4 | 4 |
| *ADM* | 11 | 10223217 | 10345499 | 5 | 5 |
| *ADRB2* | 5 | 148125000 | 148248447 | 13 | 11 |
| *AGT* | 1 | 227085019 | 227216602 | 8 | 8 |
| *AGTR1* | 3 | 149838362 | 150003486 | 15 | 15 |
| *ALOX5* | 10 | 45129634 | 45321567 | 5 | 5 |
| *ALOX5AP* | 13 | 30147668 | 30296556 | 13 | 12 |
| *ANXA2* | 15 | 58366642 | 58537477 | 3 | 3 |
| *ANXA5* | 4 | 122886752 | 123035781 | 6 | 6 |
| *APBB2* | 4 | 40597166 | 41117416 | 19 | 19 |
| *APOA1* | 11 | 116151680 | 116273334 | 2 | 2 |
| *APOE* | 19 | 50040878 | 50164489 | 1 | 1 |
| *APP* | 21 | 26114732 | 26525003 | 23 | 21 |
| *BACE1* | 11 | 116601624 | 116752182 | 7 | 7 |
| *BACE2* | 21 | 41401597 | 41630394 | 16 | 15 |
| *BDNF* | 11 | 27573019 | 27759872 | 11 | 10 |
| *BMP6* | 6 | 7612008 | 7886726 | 13 | 13 |
| *CACNA1A* | 19 | 13119114 | 13538317 | 2 | 2 |
| *CAMK2G* | 10 | 75182264 | 75364349 | 4 | 4 |
| *CBS* | 21 | 43286369 | 43429493 | 1 | 1 |
| *CCL2* | 17 | 29546408 | 29668331 | 11 | 11 |
| *CD14* | 5 | 139931504 | 140052956 | 3 | 3 |
| *CHRNA4* | 20 | 61388514 | 61523139 | 0 | 0 |
| *CHRNB2* | 1 | 151293329 | 151422156 | 2 | 2 |
| *COL3A1* | 2 | 189604604 | 189762978 | 4 | 4 |
| *COL4A1* | 13 | 109539311 | 109817459 | 10 | 10 |
| *COMT* | 22 | 18243862 | 18391084 | 3 | 3 |
| *CPB2* | 13 | 45465322 | 45637169 | 13 | 13 |
| *CRMP1* | 4 | 5880563 | 6072857 | 2 | 2 |
| *CRP* | 1 | 156435152 | 156557452 | 8 | 6 |
| *CSF2* | 5 | 131377383 | 131499758 | 0 | 0 |
| *CST3* | 20 | 23502293 | 23626574 | 7 | 6 |
| *CTNNA3* | 10 | 67289937 | 69185933 | 134 | 128 |
| *CYBA* | 16 | 87177198 | 87304950 | 1 | 1 |
| *CYP11B2* | 8 | 143928976 | 144056261 | 0 | 0 |
| *DCDC2* | 6 | 24221713 | 24526259 | 10 | 9 |
| *DES* | 2 | 220048603 | 220176964 | 0 | 0 |
| *DRP1* | 12 | 32663523 | 121840833 | 83 | 78 |
| *ECE1* | 1 | 21230390 | 21422213 | 1 | 0 |
| *EDN1* | 6 | 12338551 | 12465070 | 2 | 2 |
| *ERG* | 21 | 38615361 | 39015488 | 31 | 27 |
| *ESR1* | 6 | 152160799 | 152576520 | 22 | 21 |
| *ESR2* | 14 | 63560702 | 63934567 | 8 | 6 |
| *F10* | 13 | 112765128 | 112911842 | 1 | 1 |
| *F13A1* | 6 | 6029316 | 6325901 | 25 | 23 |
| *F13B* | 1 | 193679977 | 193828021 | 5 | 5 |
| *F2* | 11 | 46637350 | 46777634 | 0 | 0 |
| *F2R* | 5 | 75987546 | 76127054 | 7 | 5 |
| *F2RL1* | 5 | 76090609 | 76226895 | 0 | 0 |
| *F3* | 1 | 39448280 | 94779336 | 2 | 2 |
| *F5* | 1 | 166155066 | 166347379 | 15 | 13 |
| *F7* | 13 | 112748105 | 112882346 | 1 | 1 |
| *FABP2* | 4 | 120536008 | 120660921 | 10 | 10 |
| *FGA* | 4 | 155801884 | 155929501 | 1 | 1 |
| *FGB* | 4 | 155781767 | 155909841 | 1 | 1 |
| *FGG* | 4 | 155822893 | 155951408 | 2 | 2 |
| *GAPDHS* | 19 | 40656203 | 40788058 | 2 | 2 |
| *GATA4* | 8 | 11539161 | 11714918 | 12 | 11 |
| *GNB3* | 12 | 6759635 | 6886818 | 0 | 0 |
| *GRIN2A* | 16 | 9702922 | 10243371 | 26 | 25 |
| *GRIN2B* | 12 | 13545410 | 14084319 | 38 | 35 |
| *HMGE* | 4 | 7119851 | 7247872 | 6 | 6 |
| *ICAM1* | 19 | 10182778 | 10318291 | 0 | 0 |
| *IDE* | 10 | 94143962 | 94383813 | 4 | 4 |
| *IGF1* | 12 | 101232143 | 101436808 | 7 | 6 |
| *IL10* | 1 | 203269342 | 203394234 | 4 | 4 |
| *IL1A* | 2 | 113187723 | 113319202 | 3 | 3 |
| *IL1B* | 2 | 113243567 | 113370587 | 4 | 3 |
| *IL1RN* | 2 | 113531700 | 113667823 | 8 | 6 |
| *IL6* | 7 | 22480059 | 22604856 | 6 | 6 |
| *IL6R* | 1 | 151130741 | 151313261 | 3 | 3 |
| *IL8* | 4 | 74911309 | 75034466 | 5 | 4 |
| *ITGA2* | 5 | 52261013 | 52483947 | 14 | 14 |
| *ITGA2B* | 17 | 39745075 | 39882399 | 1 | 0 |
| *ITGB3* | 17 | 42626206 | 42805076 | 5 | 5 |
| *KIBRA* | 5 | 167591669 | 167889340 | 10 | 10 |
| *LETM1* | 4 | 1721990 | 1885205 | 0 | 0 |
| *LMNA* | 1 | 152837570 | 152982944 | 1 | 1 |
| *LPL* | 8 | 19781057 | 19929049 | 8 | 8 |
| *LRP8* | 1 | 53363232 | 53565842 | 2 | 1 |
| *LRRK2* | 12 | 38845200 | 39107834 | 20 | 19 |
| *LTA* | 6 | 31588071 | 31710077 | 0 | 0 |
| *LTA4H* | 12 | 94837078 | 94991833 | 16 | 16 |
| *LTB4R2* | 14 | 23788000 | 23910798 | 3 | 3 |
| *LTC4S* | 5 | 179093591 | 179216118 | 2 | 2 |
| *MAPT* | 17 | 41267623 | 41518611 | 18 | 18 |
| *MET* | 7 | 115846409 | 116092390 | 6 | 6 |
| *MMP3* | 11 | 102151742 | 102279550 | 8 | 8 |
| *MMP9* | 20 | 44010953 | 44138606 | 3 | 2 |
| *MPO* | 17 | 53642200 | 53773295 | 1 | 0 |
| *MTHFR* | 1 | 11720944 | 11860248 | 1 | 1 |
| *NCSTN* | 1 | 157066135 | 157201814 | 2 | 2 |
| *NDUFS4* | 5 | 52832241 | 53074924 | 4 | 4 |
| *NGFB* | 1 | 115480580 | 115652899 | 9 | 9 |
| *NGFR* | 17 | 44867665 | 45007360 | 2 | 2 |
| *NOS1* | 12 | 116053698 | 120843844 | 4 | 4 |
| *NOS2A* | 17 | 23047919 | 23211682 | 1 | 1 |
| *NOS3* | 7 | 150065794 | 150209323 | 1 | 1 |
| *NOTCH3* | 19 | 15071444 | 15232792 | 0 | 0 |
| *NPPA* | 1 | 11780041 | 11902101 | 1 | 1 |
| *NRG1* | 8 | 31556809 | 32801615 | 110 | 100 |
| *NTF3* | 12 | 5413526 | 5534725 | 1 | 1 |
| *NTF5* | 19 | 54196210 | 54318937 | 0 | 0 |
| *NTRK1* | 1 | 153583743 | 153724715 | 0 | 0 |
| *NTRK2* | 9 | 84454179 | 84926963 | 28 | 28 |
| *NTRK3* | 15 | 86160991 | 86660665 | 17 | 16 |
| *PARK7* | 1 | 7896058 | 8039602 | 5 | 3 |
| *PAWR* | 12 | 78428214 | 78647258 | 4 | 4 |
| *PAXIP1L* | 7 | 154113048 | 154265400 | 4 | 4 |
| *PDE4D* | 5 | 58242467 | 59879647 | 116 | 113 |
| *PLAT* | 8 | 42091911 | 42244351 | 0 | 0 |
| *PLAU* | 10 | 75280895 | 75407260 | 1 | 1 |
| *PLG* | 6 | 161033693 | 161204749 | 9 | 9 |
| *PNMT* | 17 | 17289601 | 35140254 | 3 | 3 |
| *PON1* | 7 | 94511638 | 94658495 | 9 | 9 |
| *PRKCA* | 17 | 61669387 | 62297324 | 26 | 25 |
| *PROC* | 2 | 127832245 | 127963048 | 0 | 0 |
| *PROCR* | 20 | 33163434 | 33288826 | 2 | 2 |
| *PROS1* | 3 | 95015718 | 95235600 | 1 | 1 |
| *PROZ* | 13 | 112800968 | 112934695 | 1 | 1 |
| *PRSS25* | 2 | 74608186 | 74732098 | 4 | 3 |
| *PSEN1* | 14 | 72612931 | 72816862 | 5 | 3 |
| *PSEN2* | 1 | 223305694 | 223450532 | 4 | 4 |
| *PTGS2* | 1 | 183312625 | 183441213 | 5 | 5 |
| *RTN4* | 2 | 55050979 | 55249385 | 8 | 8 |
| *SCNN1A* | 12 | 6266275 | 6414976 | 0 | 0 |
| *SCNN1B* | 16 | 23161140 | 23360117 | 5 | 4 |
| *SCNN1G* | 16 | 23041540 | 23195701 | 0 | 0 |
| *SELL* | 1 | 166331465 | 166472385 | 14 | 13 |
| *SELP* | 1 | 166229747 | 166391065 | 15 | 13 |
| *SERPINC1* | 1 | 170544599 | 170678130 | 2 | 2 |
| *SERPINE1* | 7 | 100303886 | 100435741 | 2 | 2 |
| *SERPINE2* | 2 | 224605374 | 224789498 | 5 | 5 |
| *SNCA* | 4 | 90943882 | 91175311 | 25 | 24 |
| *SNCB* | 5 | 175919816 | 176050163 | 1 | 1 |
| *SORT1* | 1 | 109504233 | 109712605 | 2 | 2 |
| *SORL1* | 11 | 120864475 | 121036098 | 7 | 7 |
| *TEK* | 9 | 27039463 | 27280171 | 23 | 23 |
| *TF* | 3 | 134887932 | 135040333 | 6 | 6 |
| *TFAM* | 10 | 59755181 | 59885903 | 5 | 5 |
| *TFCP2* | 12 | 49714887 | 49912931 | 2 | 1 |
| *TFPI* | 2 | 188096790 | 188304671 | 5 | 5 |
| *TGFB1* | 19 | 46468490 | 46611656 | 1 | 1 |
| *TGFB2* | 1 | 214848262 | 215063365 | 10 | 10 |
| *TGFB3* | 14 | 75434194 | 75577242 | 4 | 4 |
| *TGFBR3* | 1 | 91800003 | 92143580 | 14 | 13 |
| *THBD* | 20 | 22914270 | 23038301 | 6 | 5 |
| *THBS2* | 6 | 169373507 | 169531769 | 6 | 6 |
| *THBS4* | 5 | 79307095 | 79474861 | 5 | 3 |
| *TLR4* | 9 | 117486137 | 117617607 | 7 | 7 |
| *TNF* | 6 | 31591328 | 31714091 | 0 | 0 |
| *TRPS1* | 8 | 116429899 | 116810429 | 33 | 30 |
| *UBQLN1* | 9 | 83444432 | 83612507 | 4 | 4 |
| *UCHL1* | 4 | 41039856 | 41171373 | 8 | 8 |
| *VCAM1* | 1 | 100837317 | 100976620 | 5 | 5 |
| *VEGF* | 6 | 43785923 | 43922199 | 3 | 3 |
| *VLDLR* | 9 | 2551802 | 2704485 | 12 | 12 |
| *VTN* | 17 | 23658424 | 23781844 | 0 | 0 |
| *VWF* | 12 | 5868407 | 6163946 | 6 | 6 |
